# Supplementary material for: First report of VGSC mutations for resistance to synthetic pyrethroids in brown dog ticks (Rhipicephalus sanguineus sensu stricto) from Brazil
Source: Research Square preprint supplement (doi:10.21203/rs.3.rs-6866445/v1), 2025-06-17
Supplement: Supplementary file 1 [file fcd00707963ef8699d145cf1.xlsx]

## Sheet: Additional file 1
Additional file 1: Table S1. Table of genotypes generated for ten Rhipicephalus sanguineus sensu stricto ticks from Restinga, Brazil. Genotypes are based on partial gene sequences encoding the voltage-gated sodium channel (VGSC) domain II segments 4-5, VGSC domain II segment 6, VGSC domain III segment 6, three copies of the GABA-Cl channel, and three mitochondrial genes (12S, 16S, and COI). Allel…
Sample Name	VGSC allelesa						GABA-Cl channel allelesa						Mitochondrial haplotypesa			Species
	DII S4-S5		DII S6		DIII S6		GABA-Cl channel α		GABA-Cl channel β		GABA-Cl channel γ		12S	16S	COI
Rs_Restinga_01	1	1	1	1	1	1	1	1	1	2	2	2	3	6	5	Rh. sanguineus sensu stricto
Rs_Restinga_02	1	1	1	1	1	1	1	1	1	1	1	2	3	6	5	Rh. sanguineus sensu stricto
Rs_Restinga_03	1	1	1	1	1	1	1	1	1	2	1	2	3	6	5	Rh. sanguineus sensu stricto
Rs_Restinga_04	1	5b	1	1	1	1	1	1	1	2	2	2	3	6	5	Rh. sanguineus sensu stricto
Rs_Restinga_05	1	1	1	1	1	1	1	1	1	2	2	2	3	6	5	Rh. sanguineus sensu stricto
Rs_Restinga_06	1	1	1	1	1	1	1	1	1	1	2	2	3	6	5	Rh. sanguineus sensu stricto
Rs_Restinga_07	1	6b	1	1	1	1	1	1	1	2	1	2	3	6	5	Rh. sanguineus sensu stricto
Rs_Restinga_08	1	1	1	1	1	1	1	1	1	2	2	2	3	6	5	Rh. sanguineus sensu stricto
Rs_Restinga_09	1	1	1	1	1	1	1	1	1	1	1	2	3	6	5	Rh. sanguineus sensu stricto
Rs_Restinga_10	1	1	1	1	1	1	1	1	1	1	1	2	3	6	5	Rh. sanguineus sensu stricto
aSequences associated with allele and haplotype number designations are listed in Additional file 2: Table S2.
bVGSC alleles in bold red font carry single nucleotide polymorphisms (SNPs) associated with resistance to synthetic pyrethroids; allele 5=C190A, allele 6=G215T

## Sheet: Additional file 2
Additional file 2: Table S2. Unique allele sequences from the amplicon sequencing loci used in this study. Allele designations follow that of Stone et al. 2024 (Stone, N. E. et al. 2024. Ticks and Tick-Borne Diseases. 15, e102344).
Genbank Accession #	Gene/region	Allele/Haplotype #	Sequence
PP214932.1	RsNaDII_S4-5_A01	1	ATCGTGGCCTACCCTTAACCTGCTCATCTCTATCATGGGGAAAACCATCGGTGCCCTCGGGAACTTGACCTTTGTCCTGGGAATCATCATCTTCATCTTCGCCGTGATGGGAATGCAACTCT
BankIt2968435 Rs_Restinga_04 PV769410	RsNaDII_S4-5_A05	5	ATCGTGGCCTACCCTTAACCTGCTCATCTCTATCATGGGGAAAACCATCGGTGCCATCGGGAACTTGACCTTTGTCCTGGGAATCATCATCTTCATCTTCGCCGTGATGGGAATGCAACTCT
BankIt2968435 Rs_Restinga_07 PV769411	RsNaDII_S4-5_A06	6	ATCGTGGCCTACCCTTAACCTGCTCATCTCTATCATGGGGAAAACCATCGGTGCCCTCGGGAACTTGACCTTTGTCCTGGTAATCATCATCTTCATCTTCGCCGTGATGGGAATGCAACTCT
PP214931.1	RsNaDII_S6_A01	1	GGTGGAACTTTGTTGACTTCATGCATTCGTTCATGATTGTGTTTCGAGTGTTGTGCGGCGAGTGGATCCAGTCCATGTGGGACTGCATGTGGGTCTCTGGCTGGCCCTGCATCCCCTTCTTTCTCGCTACGGTAGTCATCGGGAACCTTGTG
PP214926.1	RsNaDIII_S6_A01	1	CTAACATCTACATGTACCTATATTTCGTATTCTTCATTATCTTCGGCTCCTTCTTCACCTTGAATCTATTCATCGGTGTAATTA
PP214913.1	RsGABAchannel_alpha_A01	1	CACCGTAACGCTAGTCCAGCTCGCGTCGCGCTCGGCGTCACCACCGTGCTCACAATGACCACACTCATGTCCAGTACCAACGCAGCGCTGCCCAAAATATCCTACGTCAAGAGTATCGACGTCTACCTGGGCACATGTTTCGTAATGGTGTTTACCGCGCTCCTGGAGTACGCCACGGTAGGATATCTCGG
PP214917.1	RsGABAchannel_beta_A01	1	CACCGTAACGCTACACCAGCTCGCGTCTCCCTGGGCGTGACCACAGTGCTCACCATGACCACACTCATGTCCAGTACCAACGCAGCACTGCCTAAAATCTCGTACGTGAAGAGTATCGACATCTACCTGGGGACTTGTTTCGTAATGGTGTTTGCCTCGCTCCTGGAGTACGCCACGGTAGGATATCTGGG
PP214918.1	RsGABAchannel_beta_A02	2	CACCGTAACGCTACACCAGCTCGCGTCTCCCTGGGCGTGACCACAGTGCTCACCATGACCACACTCATGTCCAGTACCAACGCAGCACTGCCTAAAATCTCGTACGTGAAGAGTATCGACATCTACCTGGGGACTTGTTTCGTAATGGTGTTTGCCTCGCTCCTGGAGTACGCCACGGTAGGATATCTCGG
PP214921.1	RsGABAchannel_gamma_A01	1	CACCGTAACGCTAGCCCGGCCCGCGTGGCCTTAGGCGTCACCACTGTGCTCACCATGACAACGCTAATGTCCAGCACGAACGCTGCACTGCCCAAAATATCGTACGTCAAGAGTATTGACGTCTACCTGGGAACGTGCTTCGTGATGGTGTTTGCGGCCCTCCTGGAGTACGCCACGGTAGGATATCTTGG
PP214922.1	RsGABAchannel_gamma_A02	2	CACCGTAACGCTAGCCCGGCCCGCGTGGCCTTAGGCGTCACCACTGTGCTCACCATGACAACGCTAATGTCCAGCACGAACGCTGCACTGCCCAAAATATCGTACGTCAAGAGTATTGACGTCTACCTGGGAACGTGCTTCGTGATGGTGTTTGCGGCCCTCCTGGAATACGCCACGGTAGGATATCTTGG
PP215070.1	Rs12S_H03	3	AGGTAAACATTGTTAGTAAATAAAAATTACGAAAGCAAAAAATTATGGCGGTATTTTAAGCTTTTCAGAGGAATTTGCTCTTTAATGGATAAAACACCTAAATCTTACTTAAATTTGTTAATTCAATTTGTATACCACTATAAAAACAATTAATAACTTCAATTGTTAAAATTTATTAAATTAAGTTATATTAAGTCAAGGTGCAGTAAAAATTTAAGAATGAAGTGAATTACATTTCTTTTTAGAGAGAGAAATTTAAATAACATTTAGGATTTGAAAGTAAAATTGAAATAGAATGTCAATTTGAATTAAGCTCTAAAATATGTACATATCGCCCGT
New accession pending	Rs16S_H06	6	TATTTAACATATAATCATTAATAATGGGTCATTTTATTTTAAAAAAGTTTTAAATATTTTTCCGCCGCCCCAGCTAAAATTTTTTCAATAGTAGTTACATATTAAATAAAATTTATAAATTCATAGGGTCTTCTTGTCCTTAATATTAATAATTGTTTCTGCACAAATTGAAAAAATTTCAATTTTTAACTTGAAAAAAGTTTTTTTCTGAAATT
PP215044.1	RsCOI_H05	5	AATAAATAATATAAGATTTTGACTTTTACCTCCTTCACTATTTTTATTAATTAACTCTTCATTAATTGAATCTGGAGCTGGTACAGGATGAACAGTTTACCCTCCTCTATCTTCAAATTTATCACATTATGGCCCTTCAGTAGATTTAGCTATCTTTTCTCTTCATCTTGCTGGTGCTTCTTCAATTTTAGGTGCAATTAACTTTATTACAACTATTGTAAACATACGGTCAATTGGAATAACAATAGAACGTATACCATTATTTGTTTGATCTGTTTTAATTACAGCTATTTTATTACTTTTATCTTTACCTGTATTAGCAGGTGCCATTACAATATTGTTAACT

## Sheet: Additional file 3
Additional file 3. Real time qPCR assay developed for the Rh. sanguineus s.s. G215T resistance SNP discovered in this study and located in domain II segments 4-5 of the VGSC.
Assay	Locus	SNP	Tm	Primer Sequence (5'-3')	Primer Concentrations (final conc.)	Disassociation Curve Temp
Domain II	G215T	G/T	58°C	Susceptible (G215T _ANC)	0.09 µM	Susceptible: 69°C
				F-ACTTGACCTTTGTCCTGCG
				Resistant (G215T_DER)	0.06 µM	Resistant: 76°C
				F2-gcccgcccgcccgcccACTTGACCTTTGTCCTCGT
				Conserved Reverse (G215T_CON)	0.15 µM
				R-GGCGAAGATGAAGATGATG
PCR reagents			20-40 ng of DNA template
(10 ul reactions)			1X SYBR® Green Master Mix
			0.792 M betaine (final conc.)
			0.2 U additional Platinum® Taq polymerase
thermocycling			95°C for 10 minutes
conditions			40 cycles of:
			Step 1: 95°C for 15 seconds
			Step 2: 58°C Tm for 60 seconds
			Step 3: 72°C for 30 seconds
			post-PCR dissociation curve
